# Supplementary material for: Surface modification of polyester fabric using plasma-dendrimer for robust immobilization of glucose oxidase enzyme
Source: PubMed Central journal article supplement (PMC6823486; doi:10.1038/s41598-019-52087-8), 2019-10-31
Supplement: 41598_2019_52087_MOESM1_ESM.pdf [file 41598_2019_52087_MOESM1_ESM.pdf]

## -----Supplementary information-----

# Surface modification of polyester fabric using plasma-dendrimer for robust immobilization of glucose oxidase enzyme

Mohammad Neaz Morshed<sup>1,2,3,4\*</sup>, Nimeshwaree Behary<sup>2,3</sup>, Nabil Bouazizi<sup>2,3</sup>, Jinping Guan<sup>4</sup>, Guoqiang Chen<sup>4</sup> and Vincent Nierstrasz<sup>1</sup>

<sup>1</sup> Department of Textile Material Technology, The Swedish School of Textiles, Faculty of Textiles, Engineering and Business, University of Borås, SE-50190, Borås, Sweden

<sup>2</sup> Ecole Nationale Supérieure des Arts et Industries Textiles (ENSAIT), GEMTEX Laboratory, 2 allée Louise et Victor Champier BP 30329, 59056 Roubaix, France

<sup>3</sup> Université de Lille, Nord de France, F-59000 Lille, France

<sup>4</sup> College of Textile and Clothing Engineering, Soochow University, 215006 Suzhou, China

\* Corresponding authors: [mohammad\\_neaz.morshed@hb.se](mailto:mohammad_neaz.morshed@hb.se) (M.N Morshed);

## 1. MATERIALS AND METHODS

### 1.1. Polyester fabric

Polyester fabrics were cleaned in order to remove impurities and spinning oil present on the surface as described in our previous work [1-4]. Typically, PET nonwovens were cut into 210 mm x 297 mm and engrossed into petroleum ether solution using Soxhlet (see **Figure S1**) for 5 hours at 60°C. In the next step nonwovens were ultrasonically rinsed along with absolute ethanol for 20 min followed by drying overnight. After that, nonwovens were repeatedly ultrasonically washed 3 times with deionized water and dried. The cleaned nonwovens were preserved for pre-activation. The characteristics of nonwoven are displayed in **Table S1**.

**Tables S1:** Characteristics of PET nonwovens

| Sample/characteristics                 | Values |
|----------------------------------------|--------|
| Mass per unit area (g/m <sup>2</sup> ) | 98.00  |
| Thicknesses (mm)                       | 0.94   |
| Fiber density                          | 0.80   |
| Porosity (%)                           | 99.91  |
| Air permeability (mm/s)                | 854.20 |

### 1.2. Plasma treatment of polyester fabrics

Plasma treatments modify polymer surfaces using plasma gases made up of a mixture of charged particles (electrons and ions), excited species (free radicals, meta-stable molecules), and photons. Atmospheric air plasma treatment

device installed in The École nationale supérieure des arts et industries textiles (ENSAIT) France was used to treat the samples in a continuous treatment process. (see **Figure S2a**) [5].

An experimental setup available at university of science and technology of Lille, France was used for plasma treatment (see **Figure S2b**). In this process, gaseous flow ( $N_2 + O_2$ ) provided by a continuous pumping with rotary pump (33 m<sup>3</sup>/h). It was excited by an electrodeless discharge provided by a microwave generator (2450 MHz) with a capacity of delivering a transmitted power up to 1200 W. The discharge was produced in a quartz tube (inner diameter 30 mm) coupled to the Pyrex cylindrical treatment chamber (diameter 150 mm and volume 15 L) [6]. The distance between the discharge and the treatment zone was 900 mm. The gaseous flow was controlled by means of a mass flow regulator and the pressure was measured with a Pirani gauge.

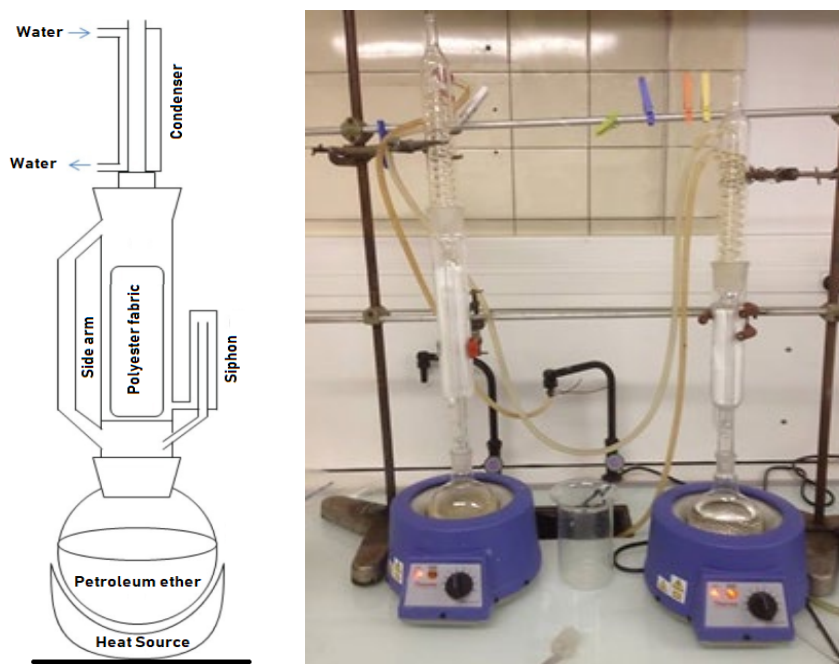

**Figure S1:** Schematic illustration and digital photograph of cleaning of polyester fabric using Soxhlet.

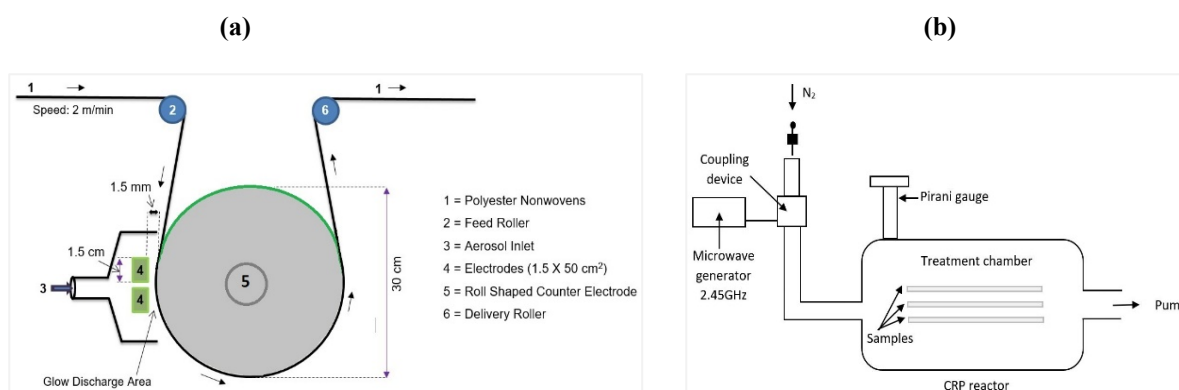

**Figure S2:** Schematic illustration of (a) coating star atmospheric plasma treatment and (b) cold remote plasma treatment machines

### 1.3. *Glucose Oxidase* activity Assay principle

Glucose oxidase activity was measured according to the enzyme's ability to catalyze the oxidation reaction of  $\beta$ -D-glucose. Hydrogen peroxide is released as a by-product of this reaction as shown in reaction (1). The produced  $H_2O_2$  enters in an another reaction with p-hydroxybenzoic acid and 4-aminoantipyrine in presence of peroxidase enzyme (POD), which results in a pink colored complex (quinoneimine dye complex) at 30° C and pH 7.

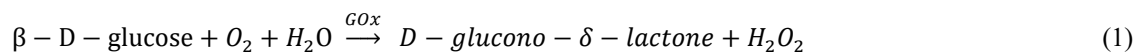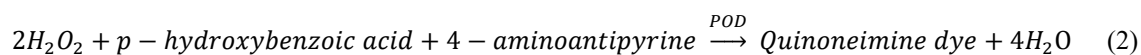

The absorbance intensity of the colored complex was monitored at  $\lambda_{510\text{nm}}$  using a UV-vis spectrophotometer exactly after 20 min. From the absorbance difference ( $A_2 - A_1$ ) between blank and GOx sample  $\Delta A_{510\text{nm}}/20\text{ min}$  can be calculated. The activity values (U/L) are obtained by following calculations.

$$\text{U/L of sample solution} = \frac{\text{mU}/0.5\text{ mL} \times 2000 \times D}{1000} \quad (3)$$

Here, 2000 is the conversion from 0.5 mL as assayed to 1 L, 1/1000 is conversion from mU to U and D is dilution factor. On the other hand, in case of solid or semi solid sample, the activity (U/g) is calculated from the amount weighed as follows;

$$\text{lucose oxidase activity (U/g of preparation)} = \frac{\text{GOx activity [U/L sample solution]}}{\text{weight [g/L sample solution]}} \quad (4)$$

## 2. RESULTS AND DISCUSSIONS

### 2.1. Water contact angle and capillary uptake measurement

(a) Untreated polyester fabric

$$\Theta_{\text{H}_2\text{O}} = 141^\circ$$

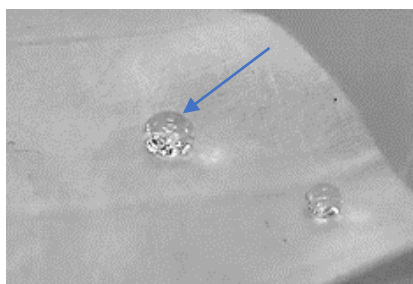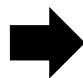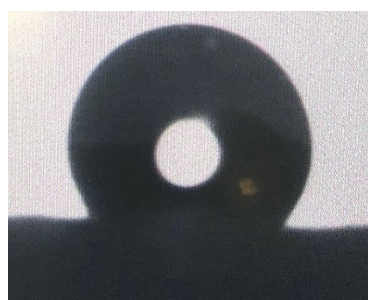

(b) Plasma treated polyester fabric

$$\Theta_{\text{H}_2\text{O}} = 0^\circ$$

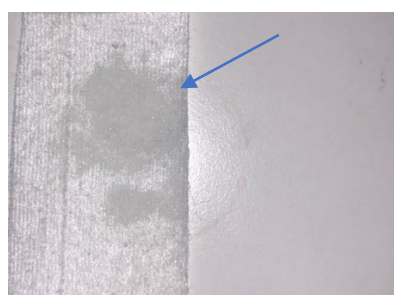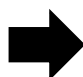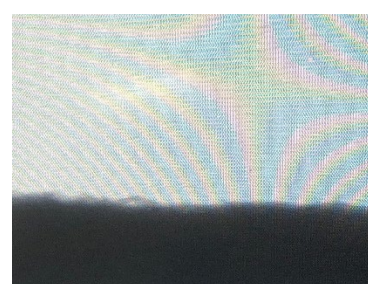

**Figure S3:** Water contact angle analysis of untreated (a) and plasma treated (b) polyester fabric using sessile water droplet.

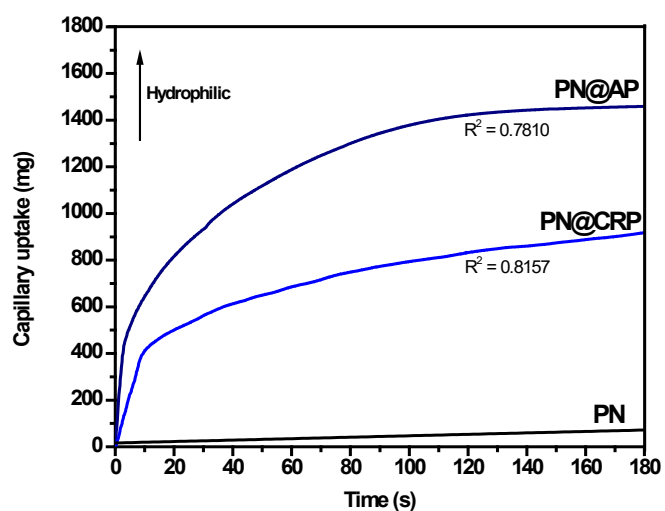

**Figure S4:** Relative capillary uptake of untreated, AP plasma treated and CR plasma treated polyester fabric.

## 2.2. X-ray Photoelectron Spectroscopy (XPS)

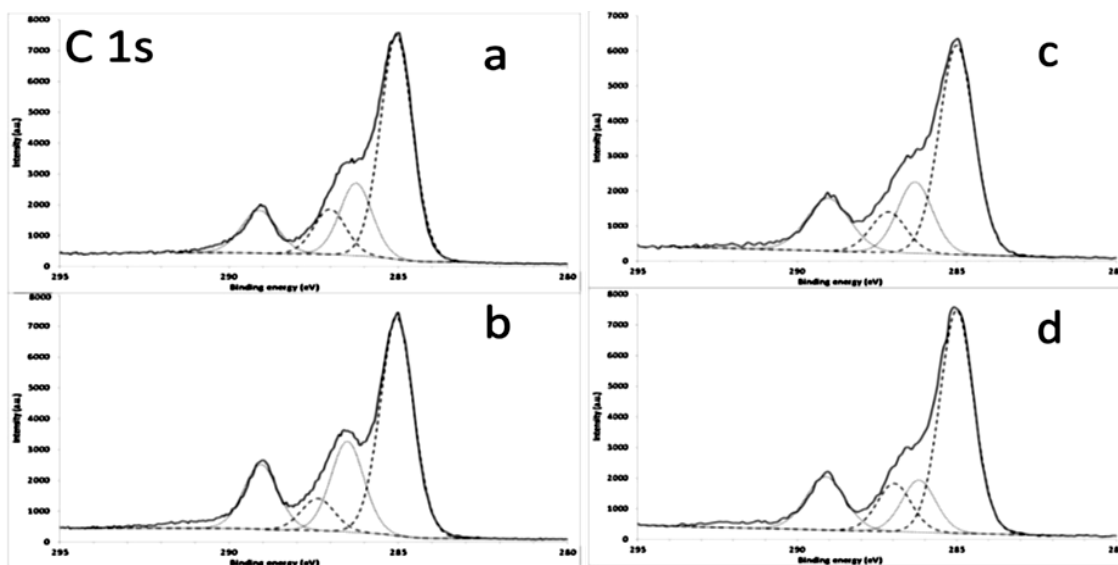

Figure S5. XPS C1s spectra of (a) untreated, (b) atmospheric pressure plasma and (c, d) cold remote plasma treated polyester surface

## 2.3. FTIR spectra of untreated and plasma treated polyester fabric

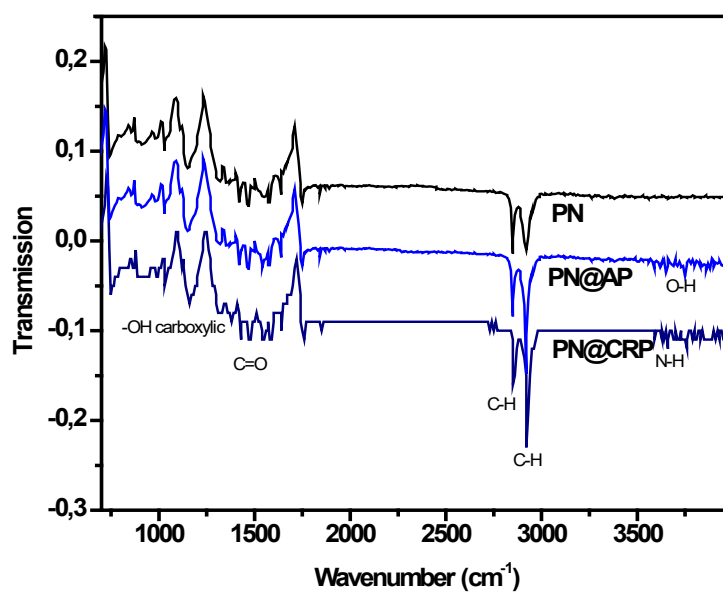

Figure S6: Fourier transform infrared spectroscopy (FTIR) spectrum of PN, PN@AP, and PN@CRP

## 2.4. Kinetics of GOx enzymatic reaction

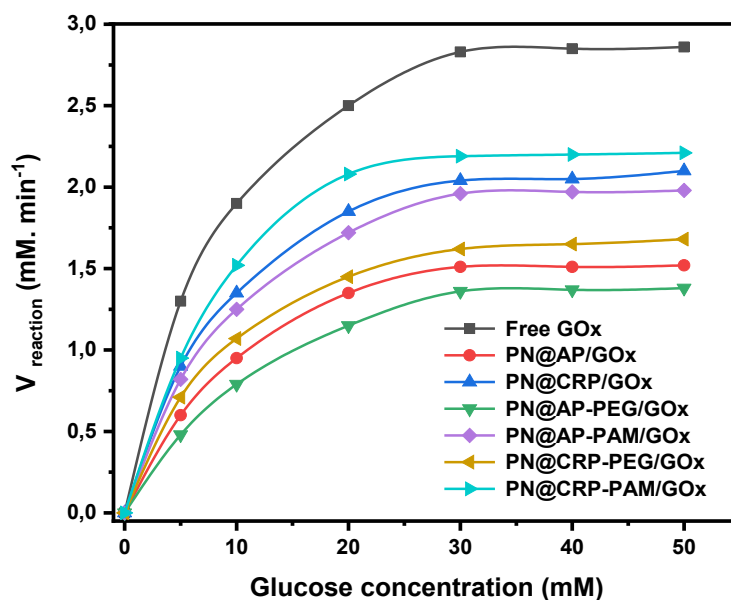

**Figure S7:** Reaction rates of free and immobilized GOx; Free GOx, PN@AP/GOx, PN@CRP/GOx, PN@AP-PEG/GOx, PN@AP-PAM/GOx, PN@CRP-PEG/GOx, PN@CRP-PAM/GOx.

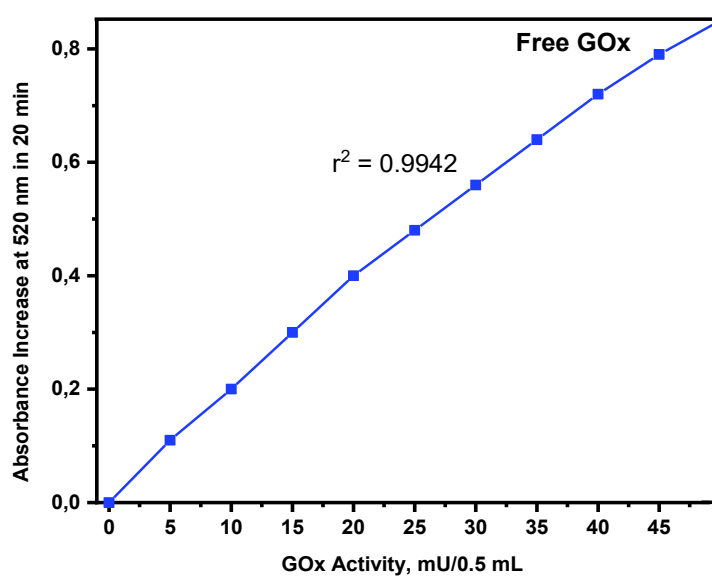

**Figure S8:** Standard curve relating glucose oxidase activity (mU/assay i.e. /0.5 mL) to absorbance at  $\lambda_{510 \text{ nm}}$



## 2.5. Antibacterial activity

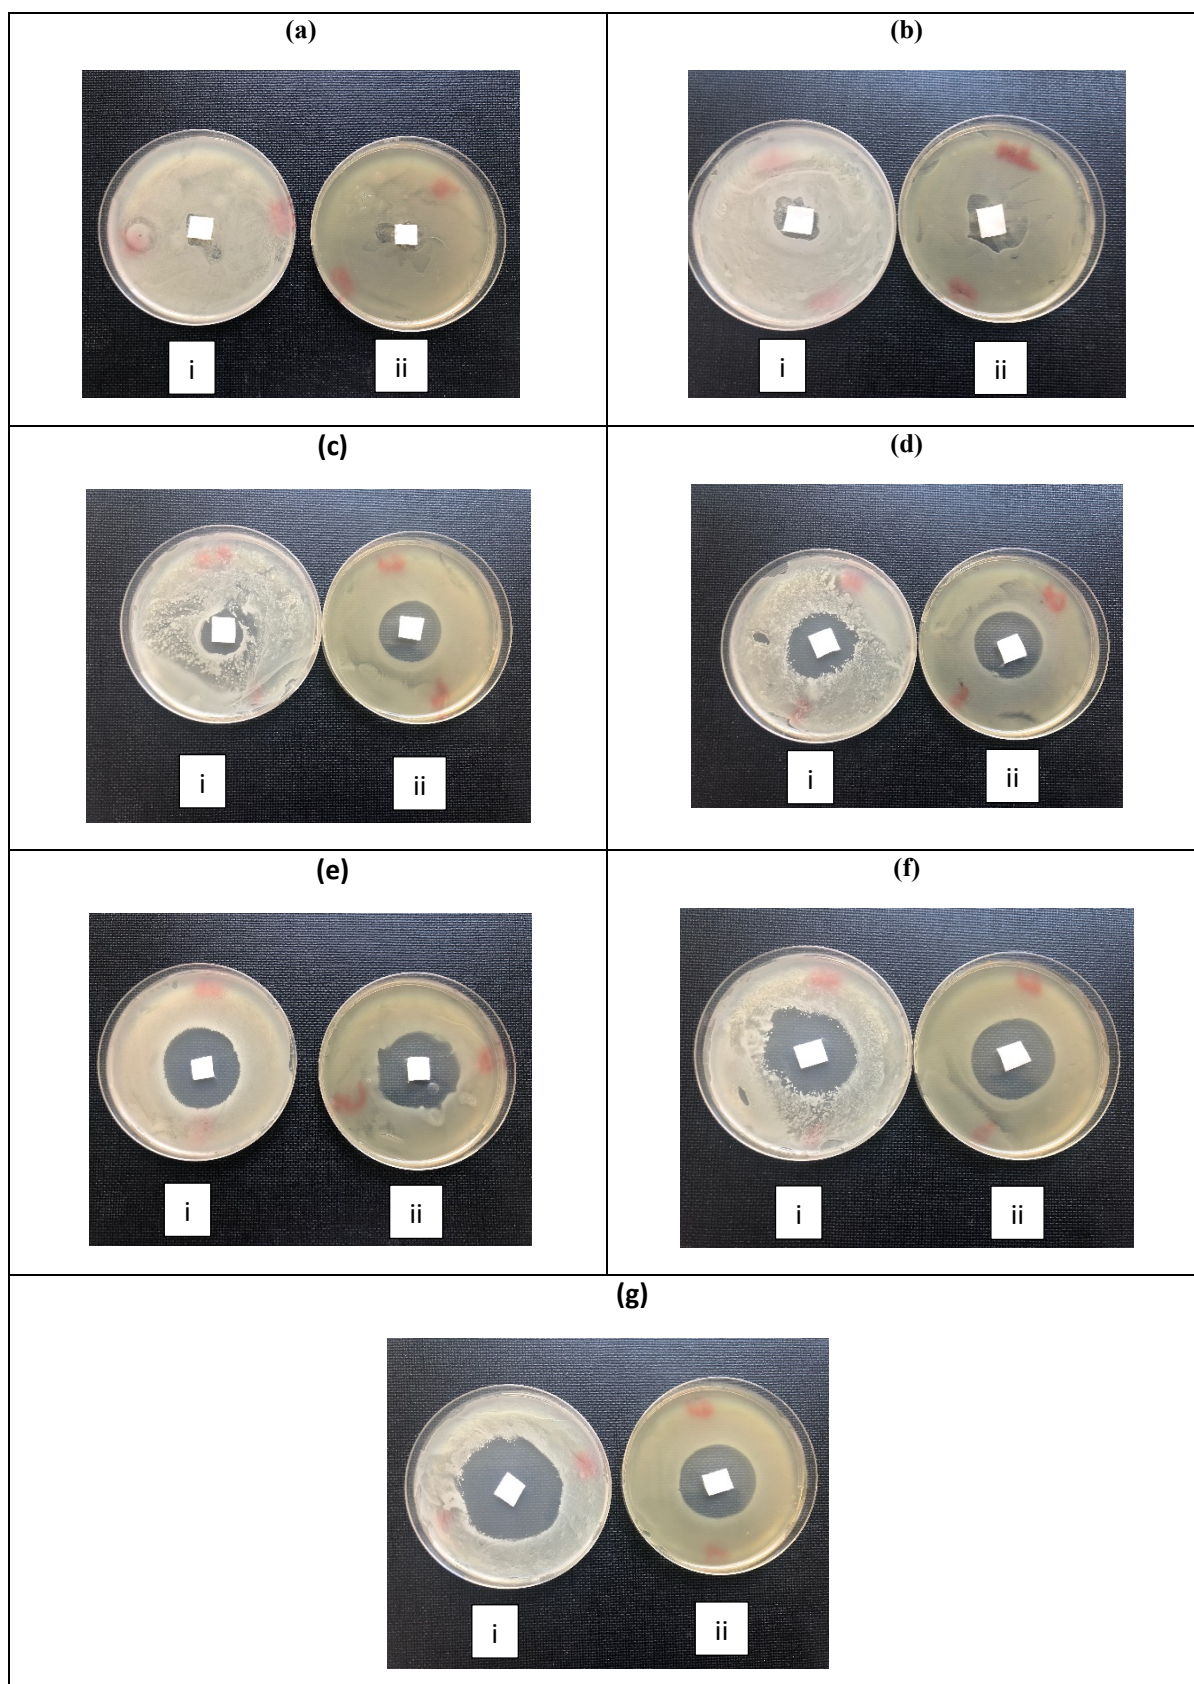

**Figure S9:** Zone inhibition analysis of (a) untreated PET, (b) PN@AP/GOx, (c) PN@CRP/GOx, (d) PN@AP-PEG/GOx, (e) PN@AP-PAM/GOx, (f) PN@CRP-PEG/GOx and (g) PN@CRP-PAM/GOx [(i) *Staphylococcus epidermidis* and (ii) *Escherichia coli*]

## References:

1. Takke, V., et al., *Studies on the atmospheric air-plasma treatment of PET (polyethylene terephthalate) woven fabrics: effect of process parameters and of aging*. Journal of applied polymer science, 2009. **114**(1): p. 348-357.
2. Nabil, B., et al., *Development of new multifunctional filter based nonwovens for organics pollutants reduction and detoxification: High catalytic and antibacterial activities*. Chemical Engineering Journal, 2019. **356**: p. 702-716.
3. Morshed, M.N., et al., *Iron-loaded amine/thiol functionalized polyester fibers with high catalytic activities: a comparative study*. Dalton Transactions, 2019.
4. Morshed, M.N., et al., *Stabilization of zero valent iron (Fe<sup>0</sup>) on plasma/dendrimer functionalized polyester fabrics for Fenton-like removal of hazardous water pollutants*. Chemical Engineering Journal, 2019. **374**: p. 658-673.
5. Mohamed, A., et al., *Activity of enzymes immobilized on plasma treated polyester*. Journal of Molecular Catalysis B: Enzymatic, 2016. **134**: p. 261-272.
6. Tiwari, S., et al., *Influence of cold remote nitrogen oxygen plasma treatment on carbon fabric and its composites with specialty polymers*. Journal of Materials Science, 2011. **46**(4): p. 964-974.
